# Supplementary material for: Vanillin-derived α,ω-diene monomer for thermosets preparation via thiol–ene click polymerization
Source: Royal Society of Chemistry journal article supplement (doi:10.1039/d2gc02901d), 2022-10-24
Supplement: d2gc02901d1.pdf [file d2gc02901d1.pdf]

## Supporting Information

### Vanillin-derived $\alpha,\omega$ -diene monomer for Thermosets Preparation via Thiol-ene

#### Click polymerization

Zijun Gao,<sup>a</sup> Yang You,<sup>a</sup> Qin Chen,<sup>a\*</sup> Michael North<sup>b</sup> and Haibo Xie<sup>a\*</sup>

<sup>a</sup>Department of Polymeric Materials & Engineering, College of Materials & Metallurgy, Guizhou

University, Huaxi District, Guiyang 550025, P.R. China. E-mail: [hbxic@gzu.edu.cn](mailto:hbxic@gzu.edu.cn);

[qchen6@gzu.edu.cn](mailto:qchen6@gzu.edu.cn).

<sup>b</sup>Green Chemistry Centre of Excellence, Department of Chemistry, University of York, York, UK.

YO10 5DD.

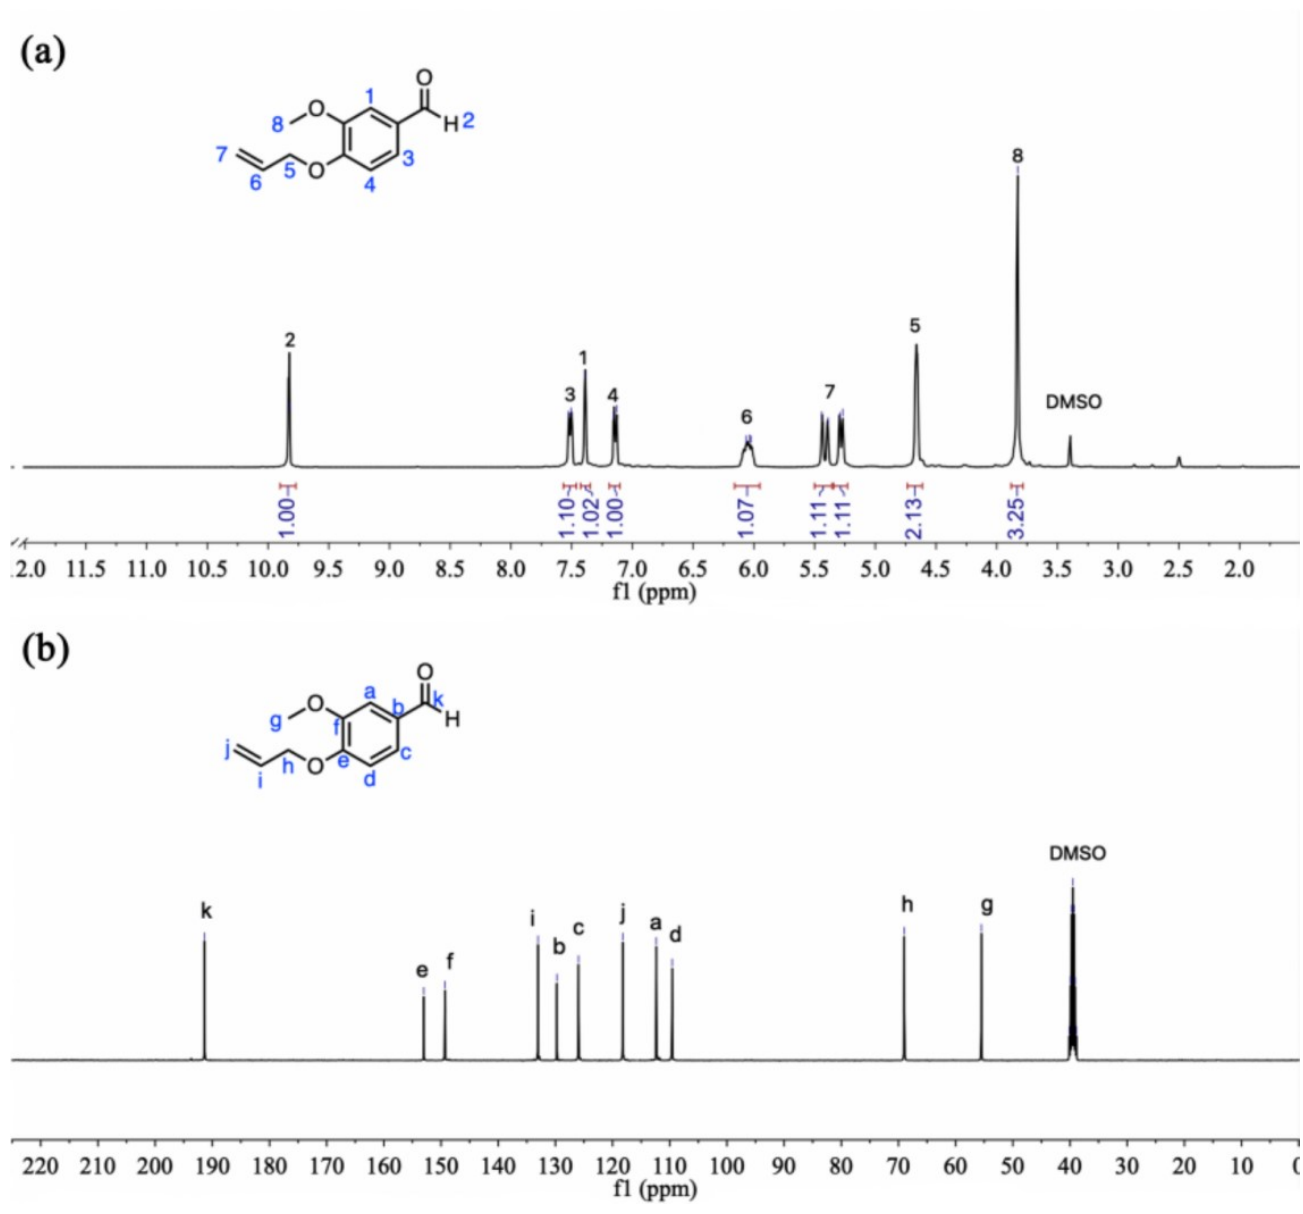

Fig. S1.  $^1\text{H}$  NMR and  $^{13}\text{C}$  NMR spectra of AM.

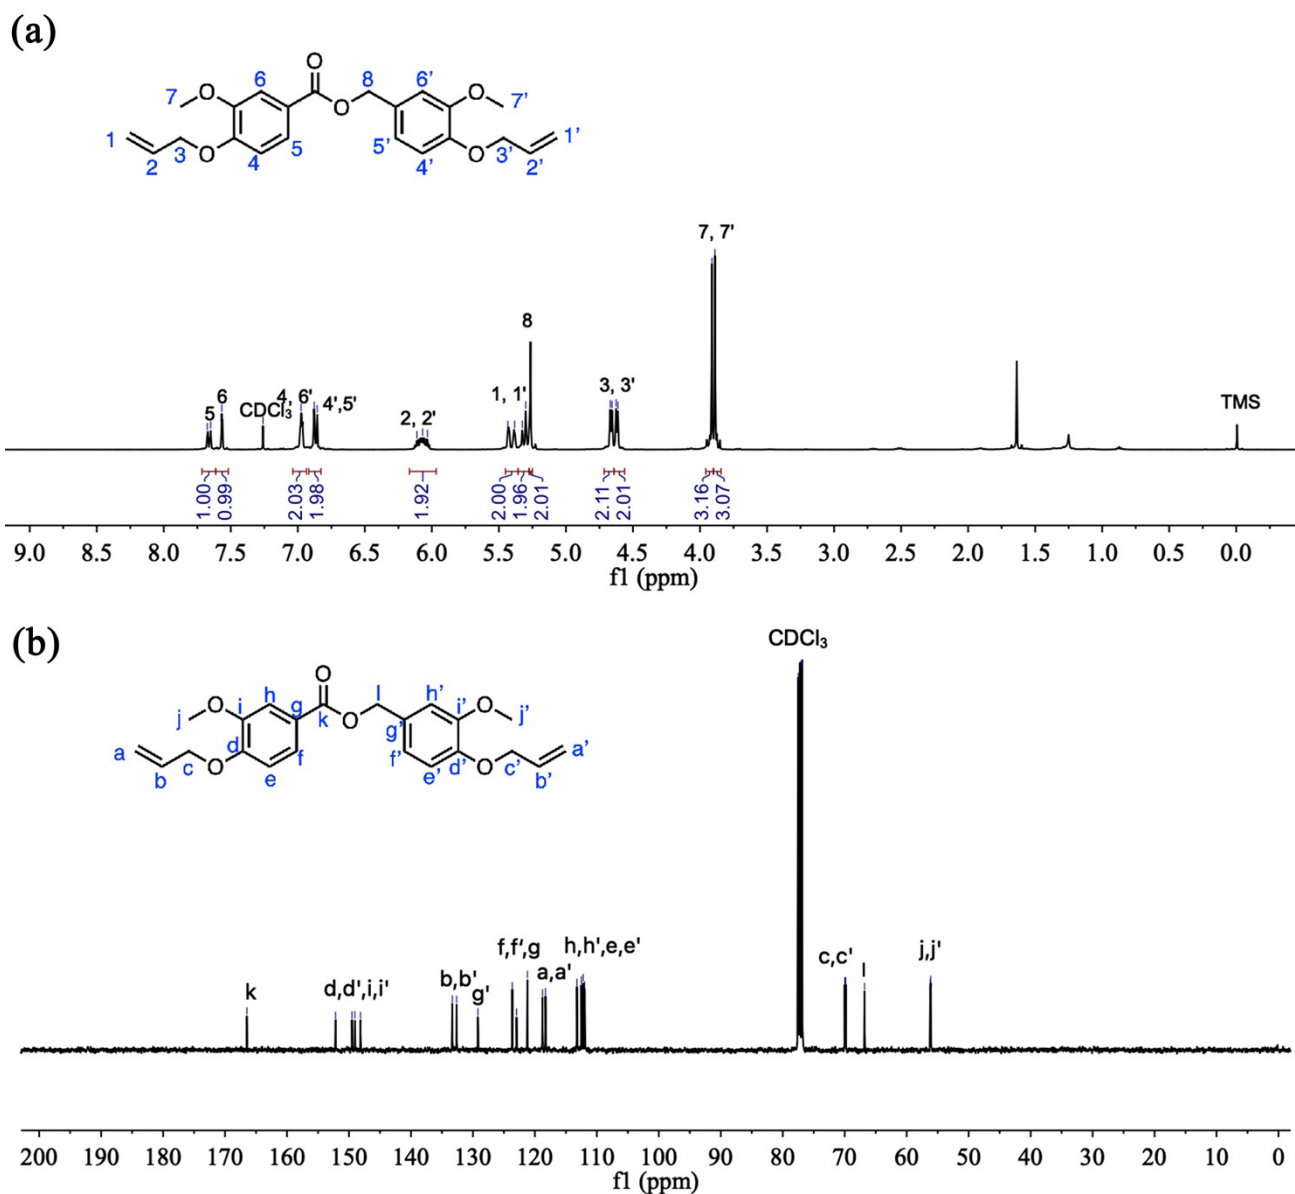

Fig. S2.  $^1\text{H}$  NMR and  $^{13}\text{C}$  NMR spectra of **1a**.

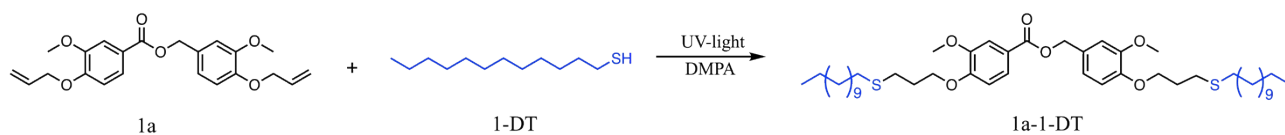

Scheme S1 Click reaction between **1a** and 1-dodecanethiol

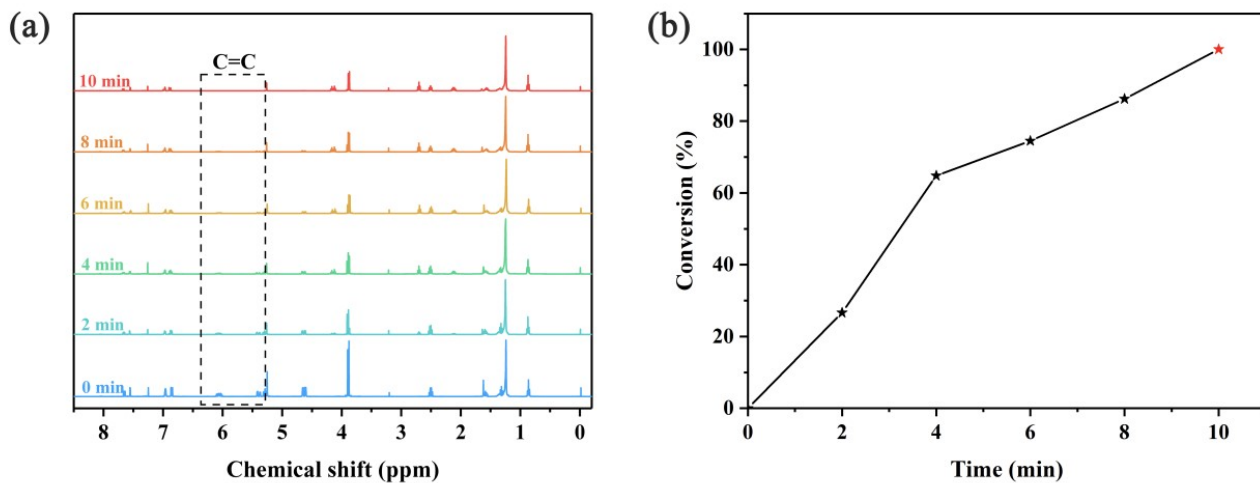

Fig. S3. (a) <sup>1</sup>H NMR spectra of the click reaction between **1a** and 1-DT every 2 minutes, and (b) the conversion of vinyl double bonds every 2 minutes under UV light.

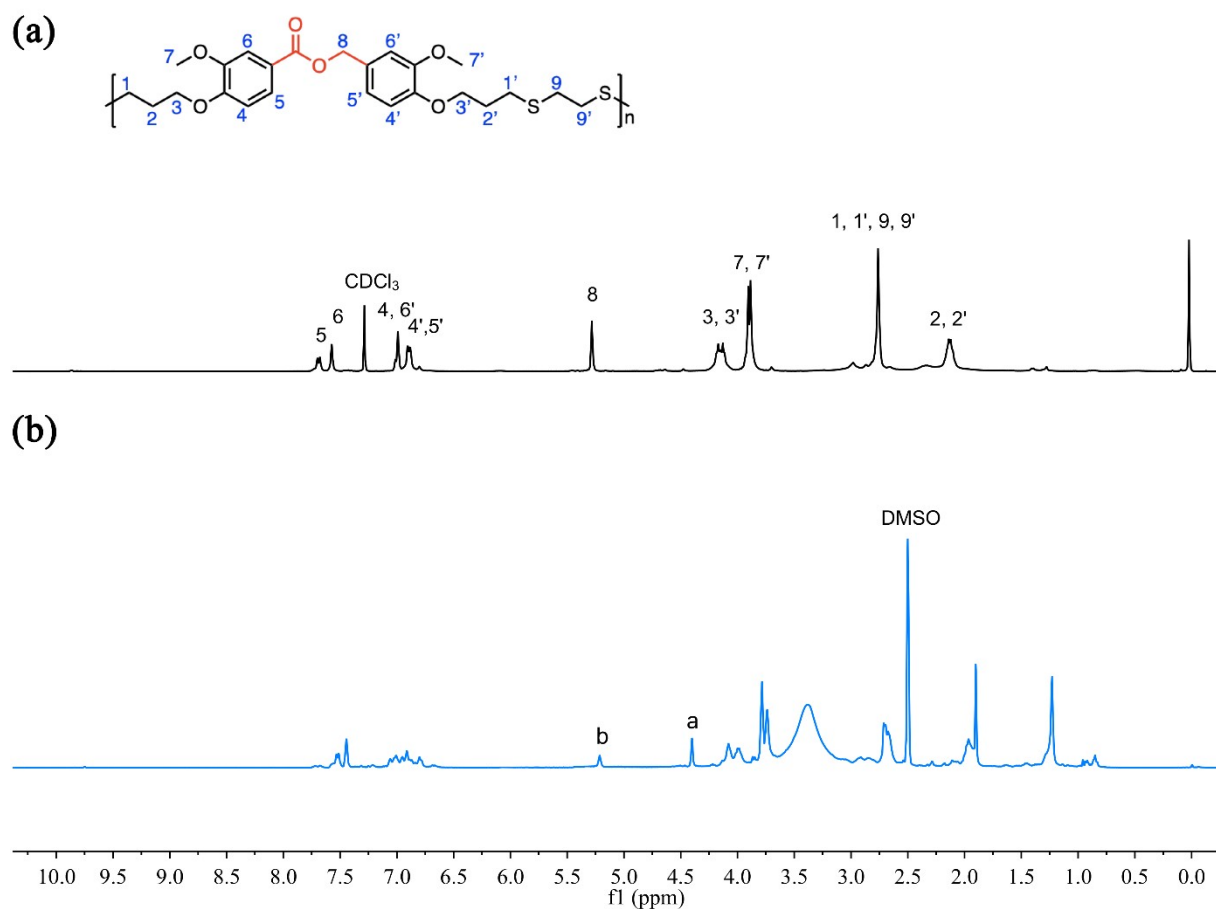

Fig. S4 Comparison of the <sup>1</sup>H NMR spectra of polyester before and after degradation in 1M NaOH: (a) before degradation, (b) after degradation.

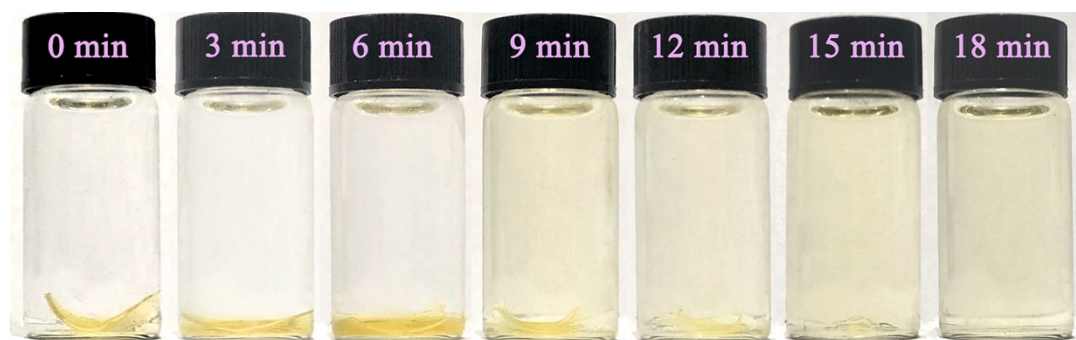

Fig. S5. Degradation of **P1a2d** in 1 M NaOH solutions (acetone/water = 5/5, v/v)
